# Supplementary material for: Ultrathin anion exchange membranes with an improved OH− transfer rate for high-performance AEMFCs
Source: Royal Society of Chemistry journal article supplement (doi:10.1039/d2ta05681j), 2022-01-01
Supplement: d2ta05681j1.pdf [file d2ta05681j1.pdf]

## Electronic Supplementary Information (ESI)

# Ultrathin anion exchange membranes with improved OH<sup>-</sup> transfer rate for high-performance AEMFCs

Wanjie Song<sup>a,‡</sup>, Xian Liang<sup>a,b,‡</sup>, Huaqing Zhang<sup>a</sup>, Xiang Liu<sup>a</sup>, Xin Zhang<sup>a</sup>, Liang Wu<sup>a</sup>, Xiaolin Ge<sup>a,\*</sup>,  
Tongwen Xu<sup>a\*</sup>

<sup>a</sup> CAS Key Laboratory of Soft Matter Chemistry, Collaborative Innovation Centre of Chemistry for Energy Materials, School of Chemistry and Material Science, University of Science and Technology of China, Hefei 230026, P.R. China

<sup>b</sup> School of Chemistry and Material Engineering Huainan Normal University Huainan, Anhui 232001, P. R. China

\* Corresponding Author: twxu@ustc.edu.cn, gexl@ustc.edu.cn

‡ Wanjie Song and Xian Liang contributed equally to this work

## Contents

|                                                     |      |
|-----------------------------------------------------|------|
| 1. <sup>1</sup> H NMR spectra characterization..... | 2-4  |
| 2. Experimental details.....                        | 5    |
| 3. Supplementary Figure .....                       | 6-10 |

## Nomenclature

|                    |                                                                                        |
|--------------------|----------------------------------------------------------------------------------------|
| AEMs               | anion exchange membranes                                                               |
| AEMFCs             | anion exchange membrane fuel cells                                                     |
| PPD                | peak power density                                                                     |
| TMHD               | N,N,N',N'-Tetramethyl-1,6-hexanediamine                                                |
| TFA                | trifluoroacetic acid                                                                   |
| TFSA               | trifluoromethanesulfonic acid                                                          |
| DCM                | dichloromethane                                                                        |
| NMP                | N-Methylpyrrolidone                                                                    |
| DMF                | N,N-Dimethylformamide                                                                  |
| TMAQA              | 6-(dimethylamino)-N-ethyl-N,N-dimethylhexan-1-aminium bromide                          |
| NBS                | N-bromosuccinimide                                                                     |
| AIBN               | azobisisobutyronitrile                                                                 |
| BP                 | the product of the copolymerization of dimethylbiphenyl, diphenyl and trifluoroacetone |
| BrBP               | bromine of BP copolymers                                                               |
| QABP               | quaternary aminated BrBP with TMAQA                                                    |
| BQAPPO             | quaternary aminated poly(2,6-dimethyl-1,4-phenylene oxide) with TMAQA                  |
| DI                 | deionized                                                                              |
| <sup>1</sup> H NMR | proton nuclear magnetic resonance spectrometry                                         |

|                |                                               |
|----------------|-----------------------------------------------|
| SEM            | scanning electron microscopy                  |
| GPC            | gel permeation chromatography                 |
| M <sub>n</sub> | number-average molar masses                   |
| M <sub>w</sub> | weight-average molar masses                   |
| DMA            | dynamic mechanical analysis                   |
| T <sub>s</sub> | tensile strength                              |
| E <sub>b</sub> | elongation at break                           |
| E'             | storage modulus                               |
| E''            | loss modulus                                  |
| T <sub>g</sub> | glass transition                              |
| AFM            | atomic force microscopy                       |
| TEM            | transmission electron microscopy              |
| SAXS           | small-angle X-ray scattering                  |
| TGA            | thermogravimetric analysis                    |
| DVS            | dynamic vapor sorption                        |
| IEC            | ion exchange capacity (mmol g <sup>-1</sup> ) |
| WU             | water uptake (%)                              |
| SR             | swelling ratio (%)                            |
| λ              | hydration number                              |
| MEA            | membrane electrode assembly                   |

## 1. <sup>1</sup>H NMR spectra characterization.

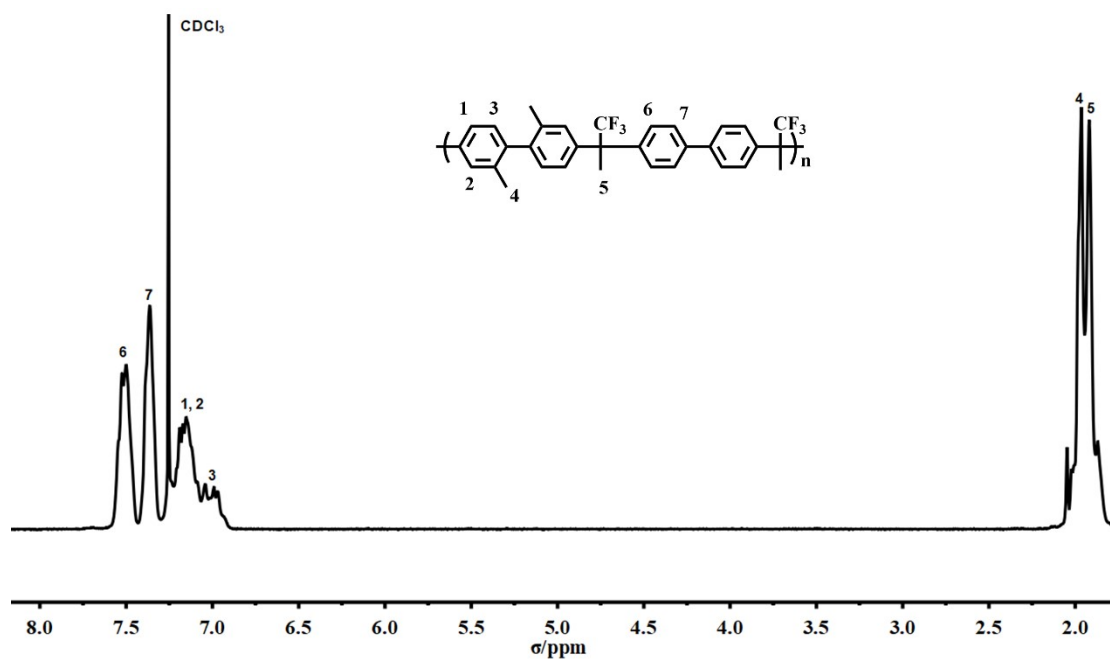

**Figure S1a.**  $^1\text{H}$  NMR spectra (400 MHz, 298K,  $\text{CHCl}_3$ ) of BP copolymers.

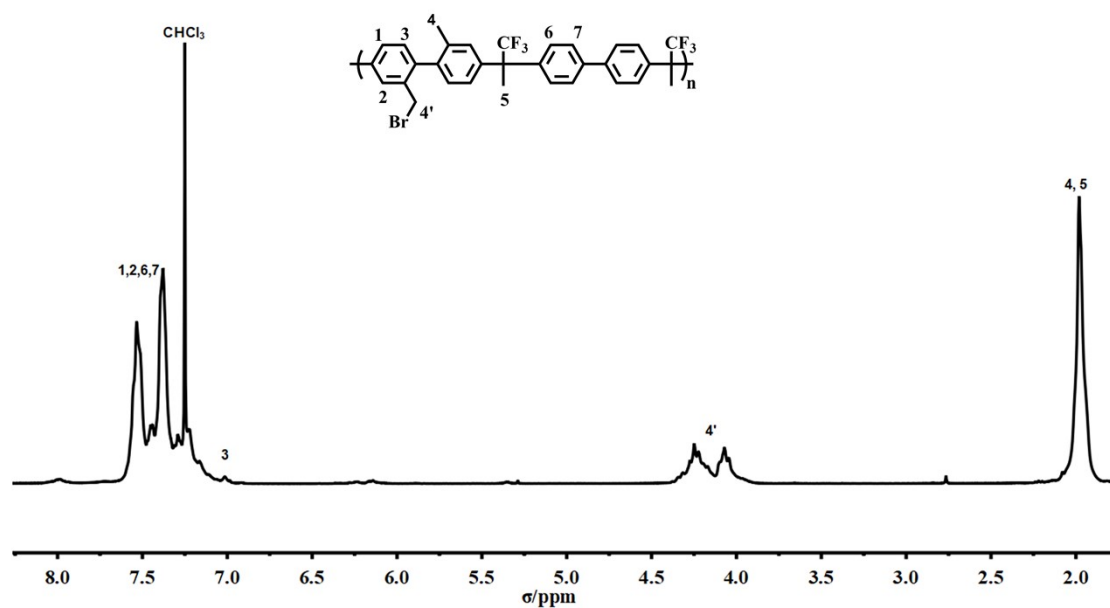

**Figure S1b.**  $^1\text{H}$  NMR spectra (400 MHz, 298K,  $\text{CHCl}_3$ ) of BrBP polymers.

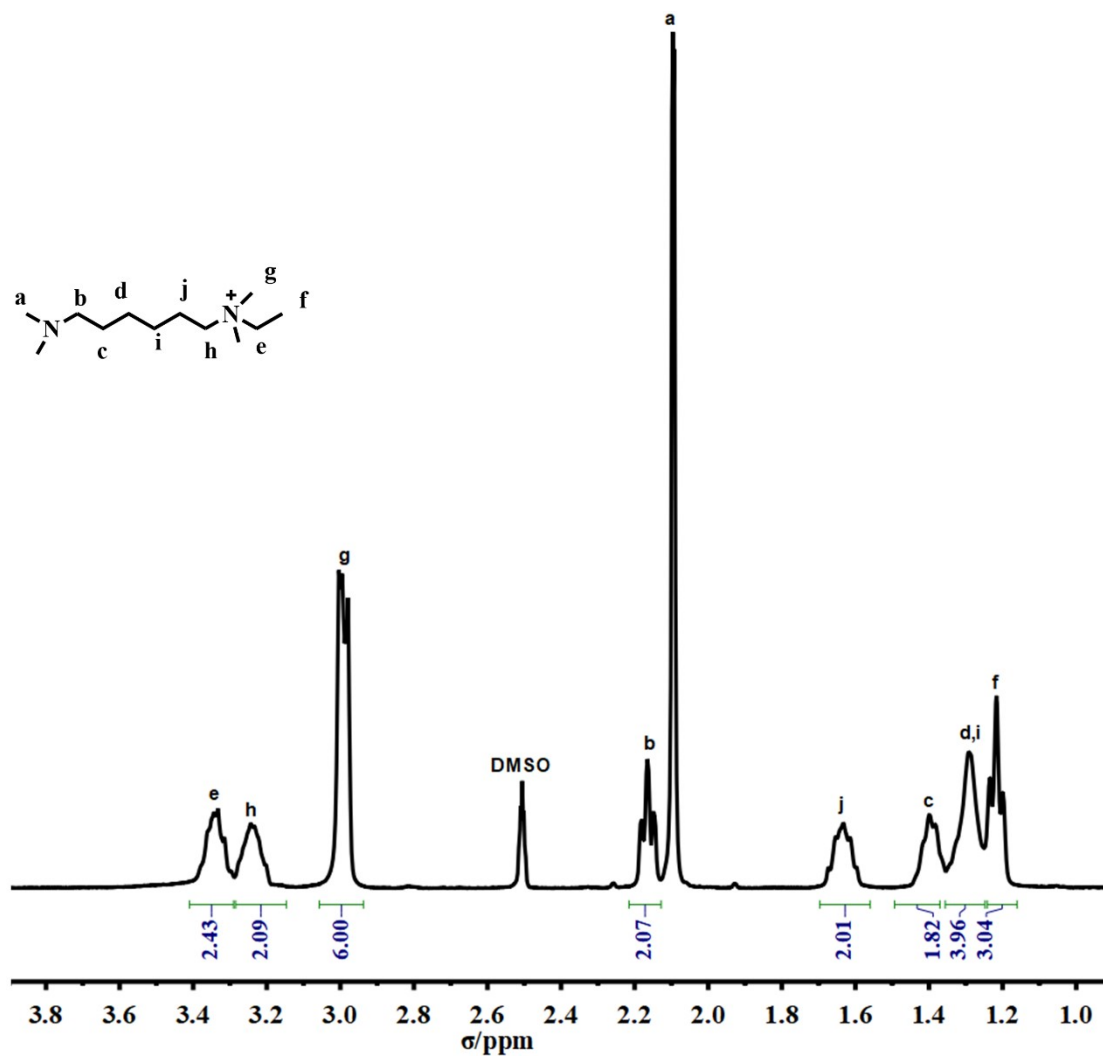

Figure S1c.  $^1\text{H}$  NMR spectra (400 MHz, 298K, DMSO) of TMAQA.

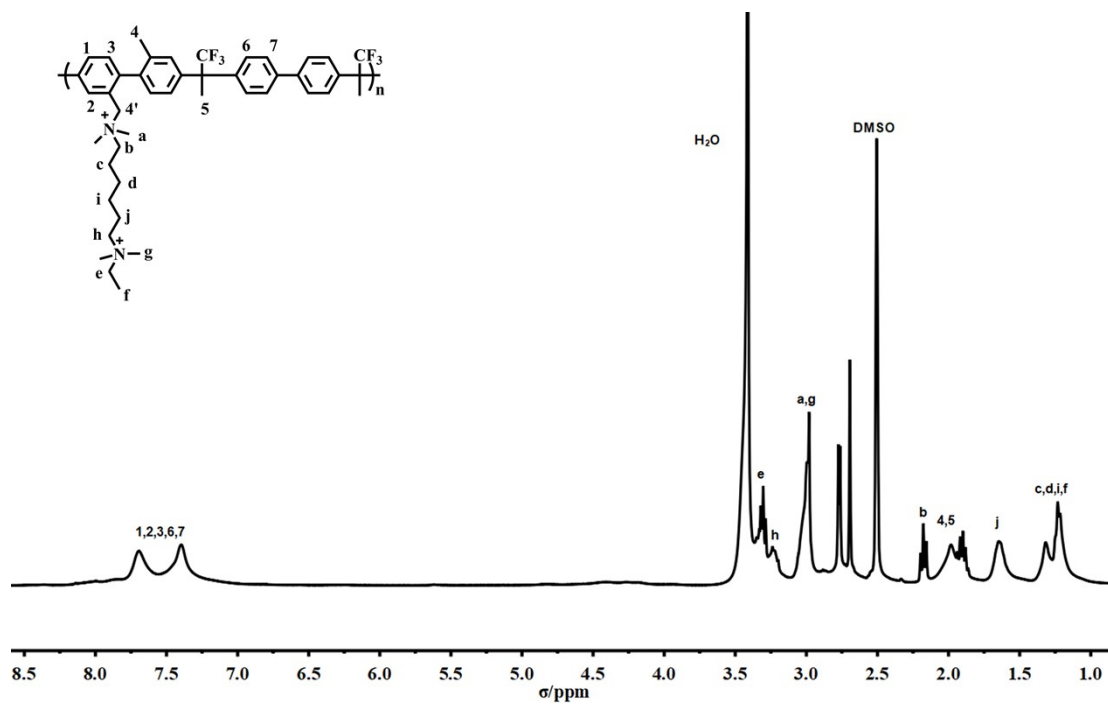

**Figure S1d.**  $^1\text{H}$  NMR spectra (400 MHz, 298K, DMSO) of QABP-1 membrane.

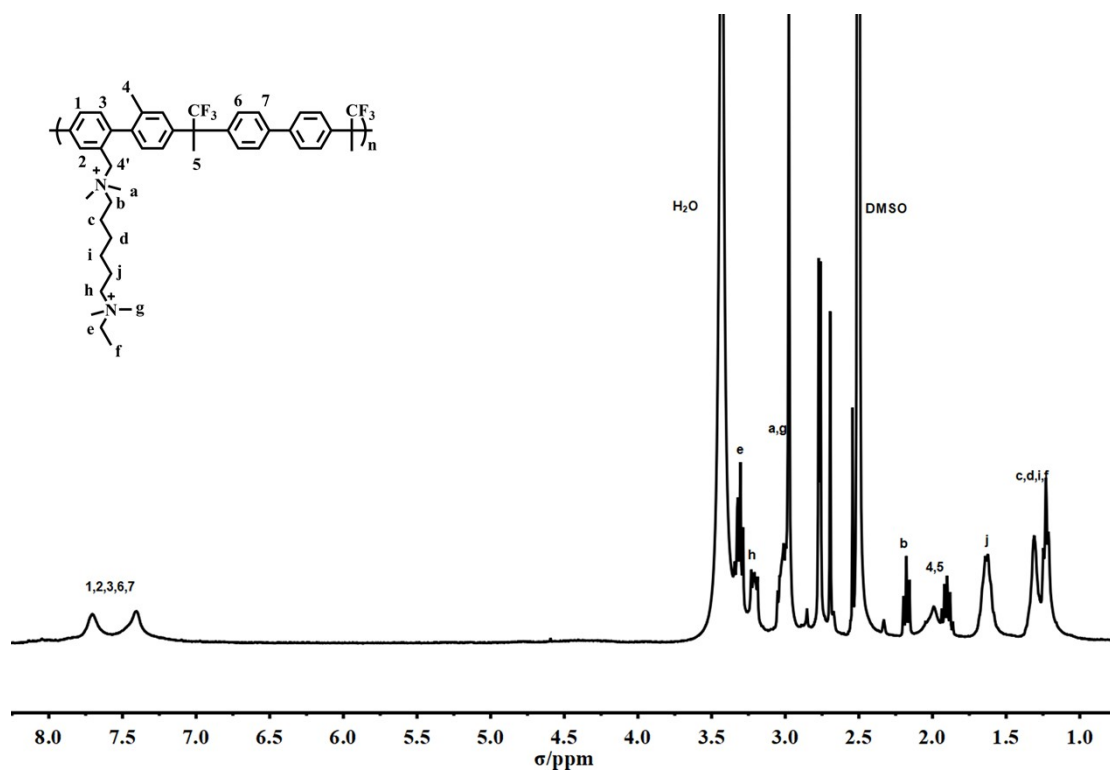

**Figure S1e.**  $^1\text{H}$  NMR spectra (400 MHz, 298K, DMSO) of QABP-2 membrane.

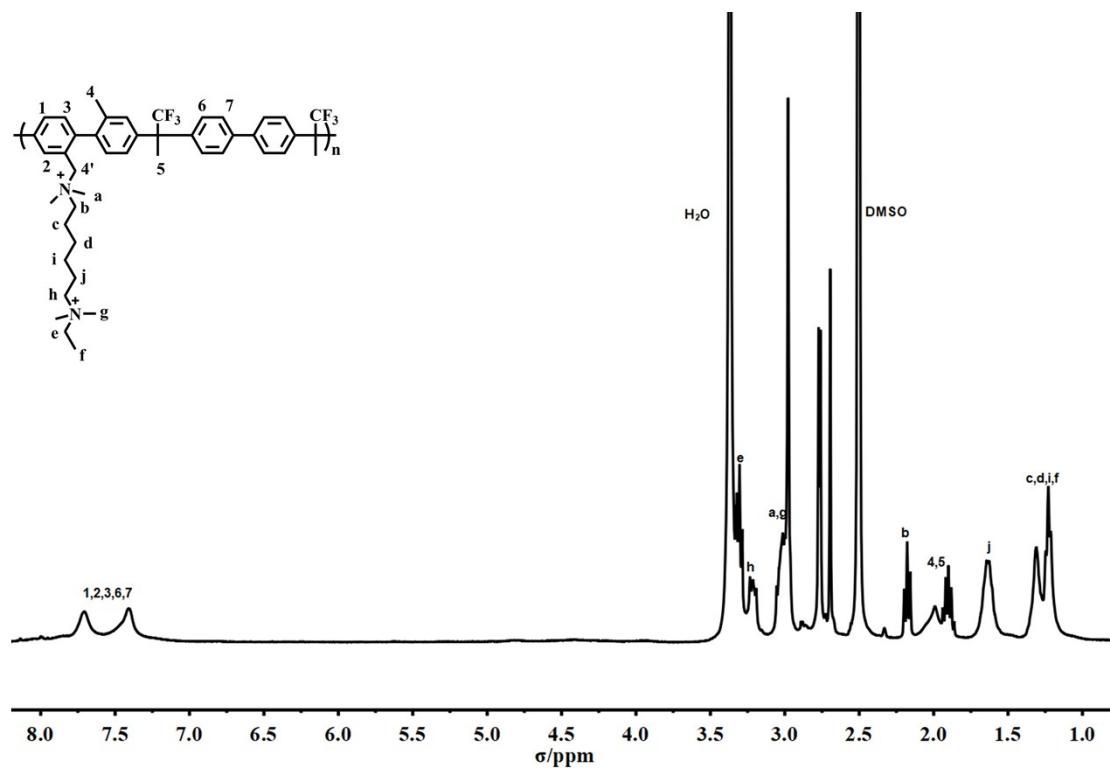

**Figure S1f.**  $^1\text{H}$  NMR spectra (400 MHz, 298K, DMSO) of QABP-3 membrane.

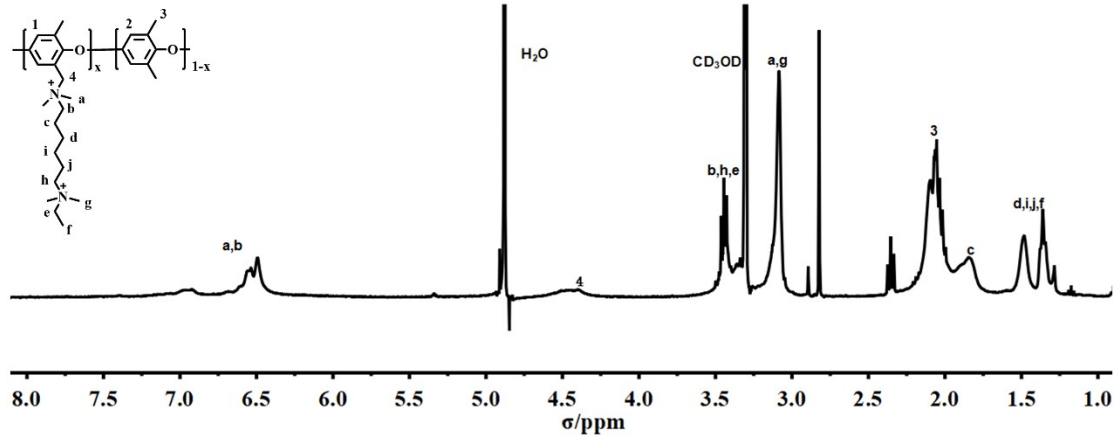

**Figure S1g.**  $^1\text{H}$  NMR spectra (400 MHz, 298K,  $\text{CD}_3\text{OH}$ ) of BQAPPO membrane

## 2. Experimental details.

**Measurements of IEC, WU and SR.** IEC was measured by the conventional method of Mohr titration. A thoroughly dried membrane sample was first weighed and then immersed in  $1 \text{ mol L}^{-1}$   $\text{NaCl}$  aqueous solution (aq.) for 24 h. After washed with DI water for 24 h, it was immersed in  $0.5 \text{ mol L}^{-1}$   $\text{NaSO}_4$  aq. for another 24 h to release  $\text{Cl}^-$  from the membrane. Lastly,  $0.1 \text{ mol L}^{-1}$   $\text{AgNO}_3$  aq. was used to titrate the solution with  $\text{K}_2\text{CrO}_4$  indicator. IEC was calculated as follows:

$$IEC(\text{mmol/g}) = (v_{\text{AgNO}_3} \times C_{\text{AgNO}_3}) / W_{\text{dry}}$$

Membrane samples with size of  $4 \text{ cm} \times 4 \text{ cm}$  were dried at  $80 \text{ }^\circ\text{C}$  for 12 h and recorded the mass and length. After that, the samples were soaked in  $1 \text{ mol L}^{-1}$   $\text{NaOH}$  aq. for 24 h and washed with DI water. The mass and length were again recorded after wiped excess water on the membrane surface. The WU and SR were calculated according to follows:

$$\text{Water Uptake}(\text{wt}\%) = \frac{W_{\text{wet}} - W_{\text{dry}}}{W_{\text{dry}}} \times 100\%$$

$$\text{Swell Ratio}(\text{wt}\%) = \frac{L_{\text{wet}} - L_{\text{dry}}}{L_{\text{dry}}} \times 100\%$$

**Measurements of hydration number ( $\lambda$ ).** The number of water molecules per QA group, denoted as  $\lambda$ , was calculated from the DVS data by the following equation:

$$\lambda = \frac{W}{18 \times IEC}$$

**Measurements of OH<sup>-</sup> Conductivity.** Membrane samples with a size of 1 cm × 4 cm were immersed in deaerated deionized (DI) water and sealed in glass bottles for 24 h under room temperature. Then the samples were washed more than ten times with deionized water to remove lye from the membrane surface. It was quickly fixed in a Teflon cell after measured the width and thickness and immersed in a DI water bath. We used the standard four-point probe technique that operated in galvanostatic mode with an amplitude of 10 uA and frequencies from 1M Hz to 100 Hz. The impedance (R) at fully hydrated conditions and given temperature were collected on AC impedance analyzer (Zahner Zennium E). The in-plane hydroxide conductivity ( $\sigma$ ) was calculated from the following equation:

$$\sigma = \frac{L}{Rwd}$$

where L is the distance between potential sensing electrodes, R is the measured resistance, d is the thickness of membrane and w is its width.

**Estimation of the alkaline stabilities.** The membrane samples were soaked in 1 mol L<sup>-1</sup> NaOH aq. at 80 °C for controlled periods. Afterward, the samples were washed with DI water before measuring the OH<sup>-</sup> conductivity.

**Raman spectrum.** The spectrum at each dry QABP-2 membrane sampling point was recorded with a spectral range of 1800–400 cm<sup>-1</sup> using LabRamHR Evolution with the excitation wavelength  $\lambda = 785$  nm (17 mW).

**Solid-state NMR.** The <sup>13</sup>C magic-angle spinning spectra of dried QABP-2 membrane samples were collected using the 600 MHz WB Solid-State Nuclear Magnetic Resonance Spectrometer (<sup>1</sup>H resonance = 600 MHz, Bruker AVANCE NEO 600 WB).

### Supplementary Figure.

**Table S1.** GPC data of BrBP and BPPO polymers.

| Polymer | Retention time | Mn    | Mw     | Mp     | Mz     | Mz+1   | Polydispersity index | Mz/Mw |
|---------|----------------|-------|--------|--------|--------|--------|----------------------|-------|
| BrBP    | 18.124         | 89660 | 267648 | 379969 | 367959 | 433400 | 2.985                | 1.375 |



|      |        |       |       |       |        |        |       |       |
|------|--------|-------|-------|-------|--------|--------|-------|-------|
| BPPO | 19.733 | 22477 | 76076 | 97513 | 171570 | 273439 | 3.384 | 2.255 |
|------|--------|-------|-------|-------|--------|--------|-------|-------|

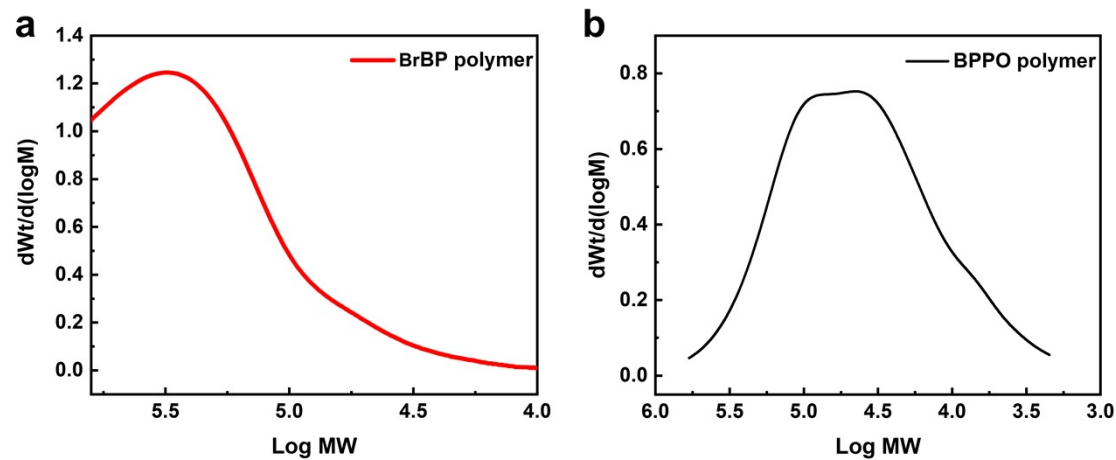

**Figure S2.** GPC trace of (a) BrBP polymers and (b) BPPO polymer (the mobile phase is THF).

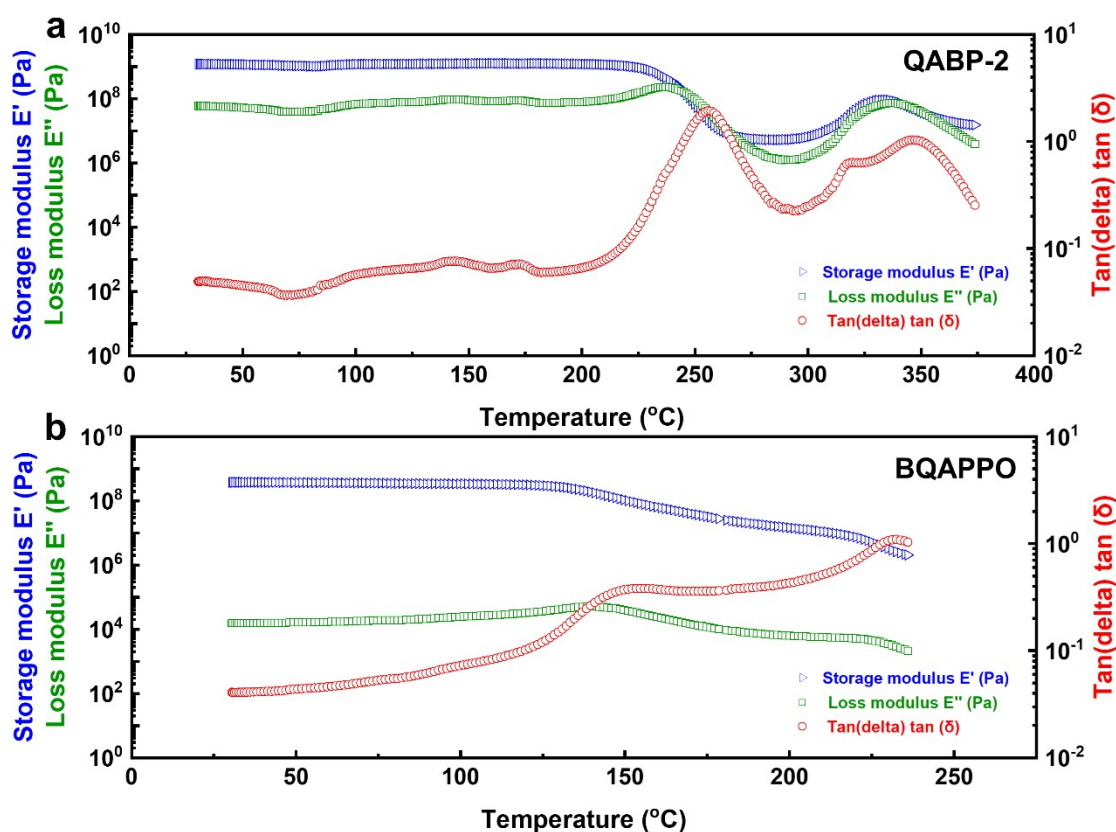

**Figure S3.** Dynamic mechanical analysis (DMA) profiles for (a) QABP-2 and (b) BQAPPO.

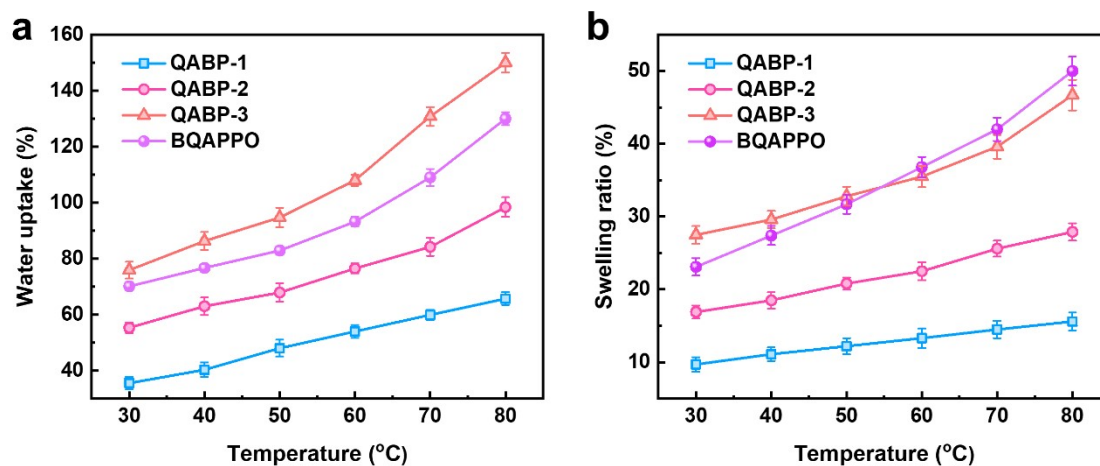

**Figure S4.** (a) Water uptake and (b) Swelling ratio of QABP-x and BQAPPO membranes versus temperature.

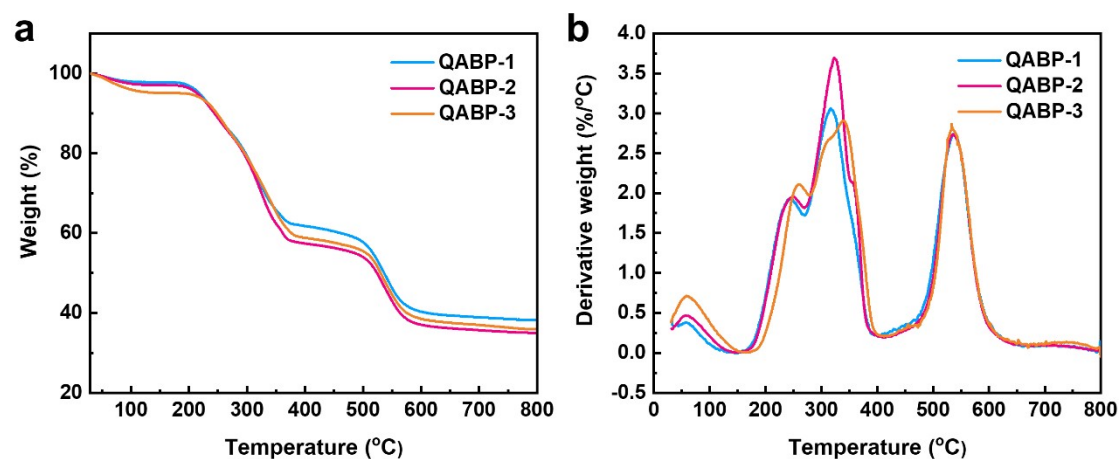

**Figure S5.** (a) Thermogravimetric analysis (TGA) and (b) differential thermal gravity (DTG) curve of the QABP-x membranes.

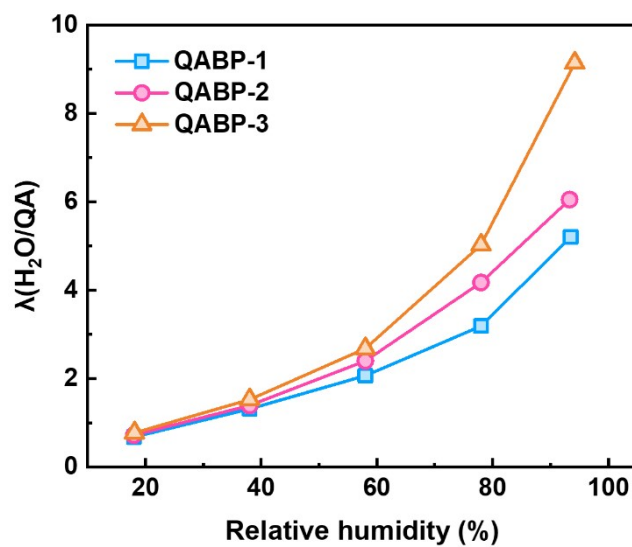

**Figure S6.** The hydration number of QABP-x membranes calculated from the DVS

experimental data.

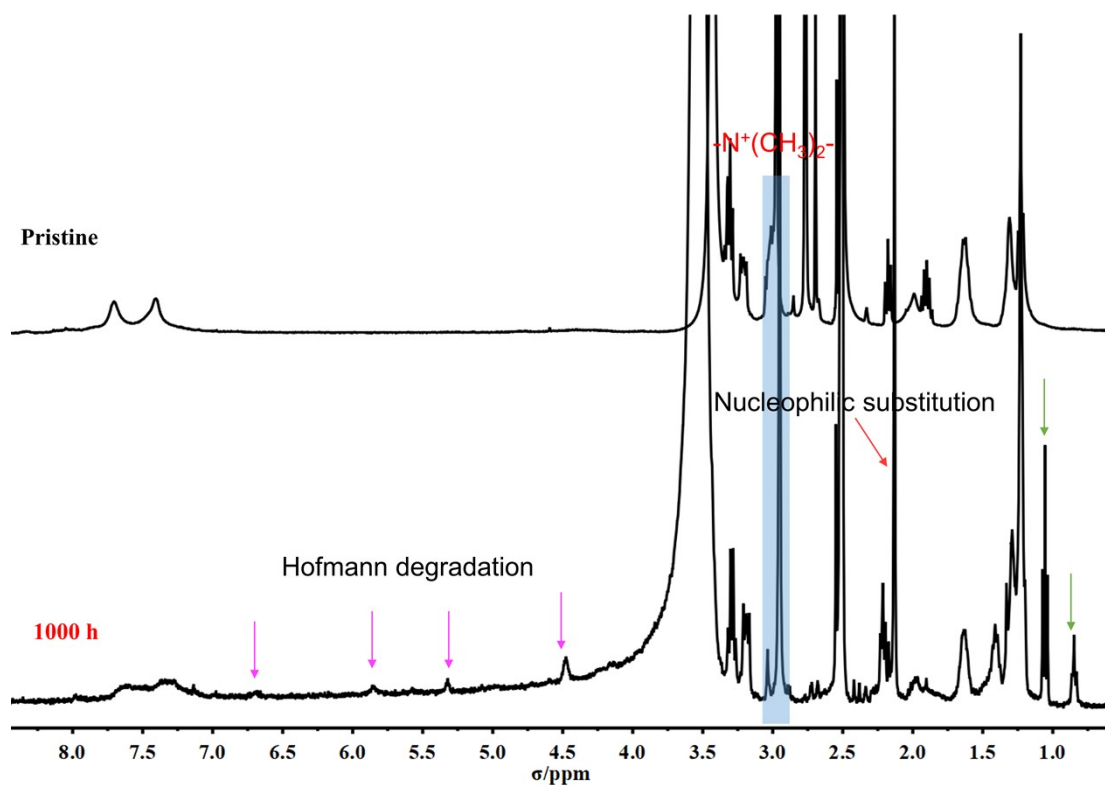

**Figure S7.**  $^1\text{H}$  NMR spectra of a QABP-2 membrane before and after treatment in 1 M NaOH at 80 °C.

As shown in Figure S7, the peak at 3.0 ppm of QA decreases after alkaline treatment. The new signals started to appear at 5.8 ppm, 5.3 ppm is consistent with the formation of  $-\text{N}^+(\text{CH}_3)_2-(\text{CH}_2)_4\text{CH}=\text{CH}_2$  groups on the side chains as a result of Hofmann elimination of terminal QA cations. Additionally, signals that emerge at 6.6 ppm and 4.5 ppm are also due to the Hofmann elimination<sup>1</sup>. Signals emerge at 2.1 ppm ascribed to the hydrogen on a tertiary amine caused by nucleophilic substitution<sup>2</sup>. The new signals at 1.0 ppm and 0.8 ppm ascribed to methylene on the degradation molecular<sup>3</sup>.

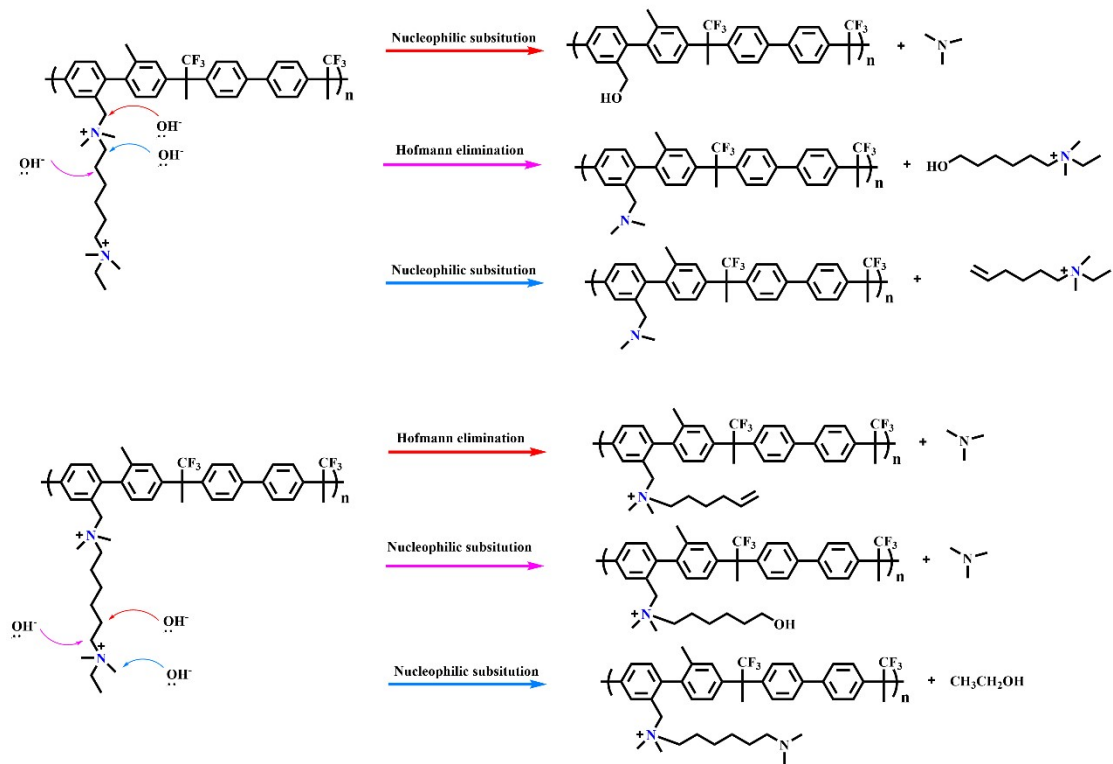

**Figure S8.** The possible degradation pathways of the QABP-2 AEMs under alkaline conditions (1 M NaOH aqueous solution, 80 °C).

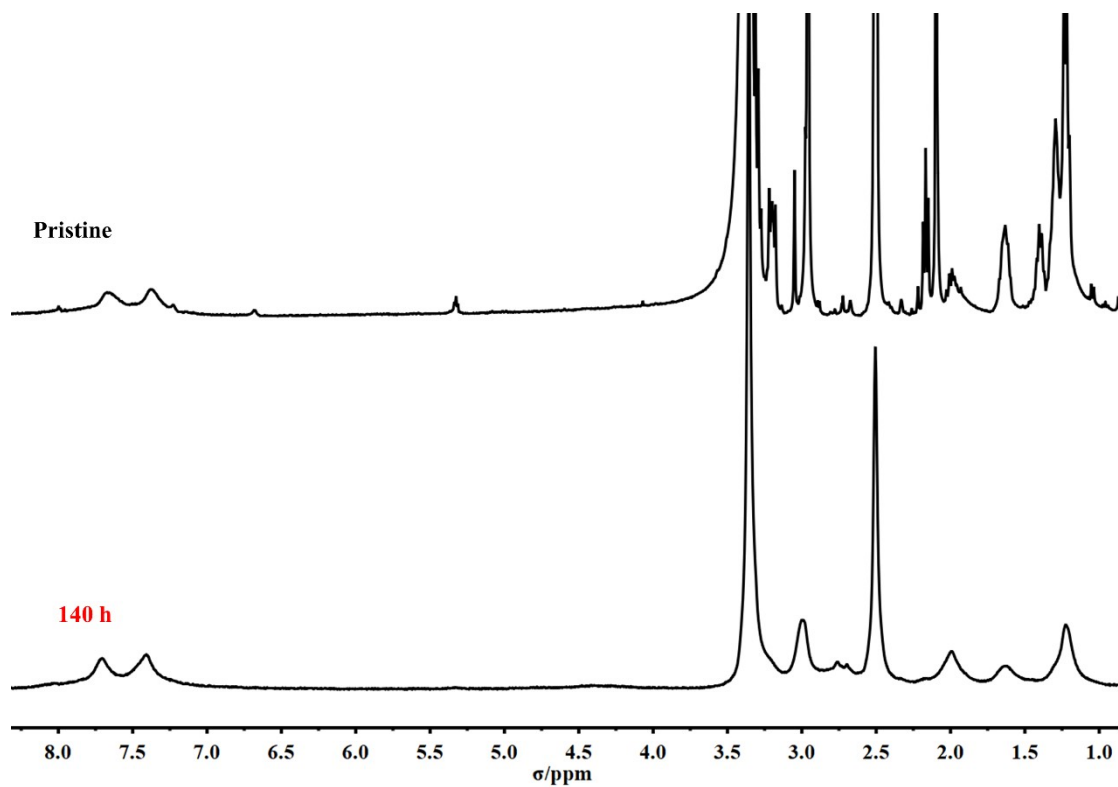

**Figure S9.**  $^1\text{H}$  NMR spectra of a QABP-2 membrane before and after long-term

durability test of fuel cells for 140 h.

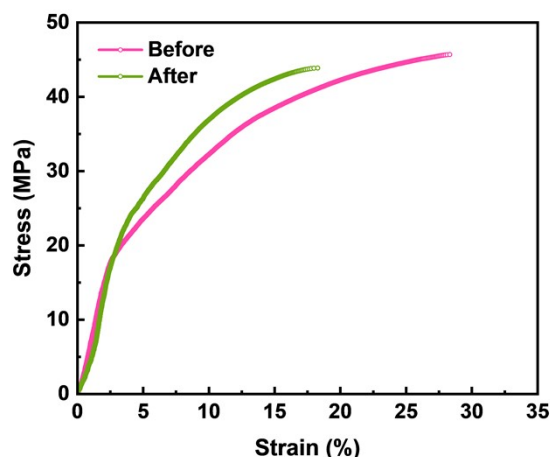

**Figure S10.** The mechanical properties (in  $\text{OH}^-$  form and wet state) of QABP-2 in 1 M NaOH at 80 °C for 1000 h.

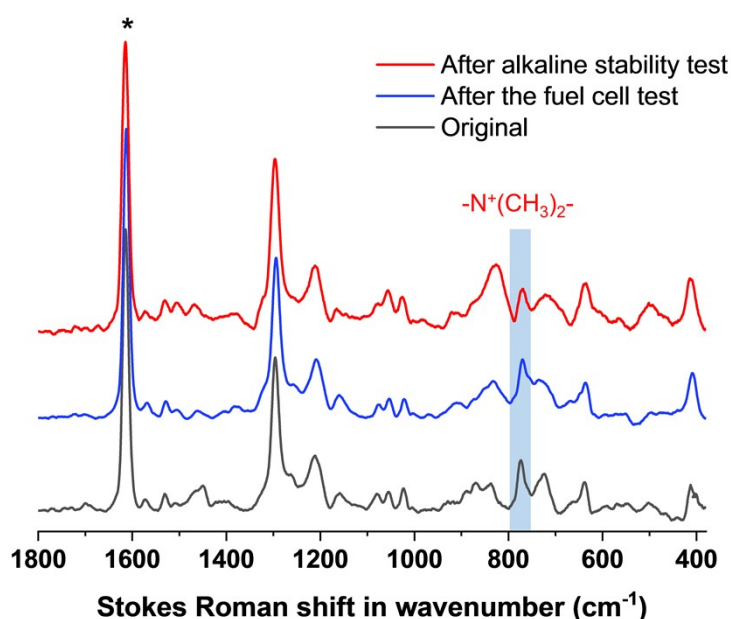

**Figure S11.** The Raman spectra of (a) QABP-2 before (bottom spectrum) and after operating in fuel cell (middle spectrum) and after alkaline stability test in 1 M NaOH at 80 °C (top spectrum); All spectral intensities are normalized to the peak labeled \* to aid in visual comparison.

As shown in **Figure S11**, almost no changes to the aromatic peaks (1615, 1295, and 1212  $\text{cm}^{-1}$ ) are observed for the AEM after alkaline stability and fuel cell operation. Additionally, the photos taken after the alkaline stability test (**Fig 4d**) and the stress-strain test (**Figure S10**) also show that the visual appearance and mechanical strength

of the AEM have hardly changed. These suggest the integrity of the aggregate backbone. But, the ammonium (QA) peak at  $774\text{ cm}^{-1}$  shows a decreased intensity for the AEM after alkaline stability while minor changes to the AEM after the fuel cell test. This suggests that the  $\text{OH}^-$  nucleophilic attack results in the loss of the QA group. The operation time of 140 hours doesn't result in the obvious degradation of QA groups.

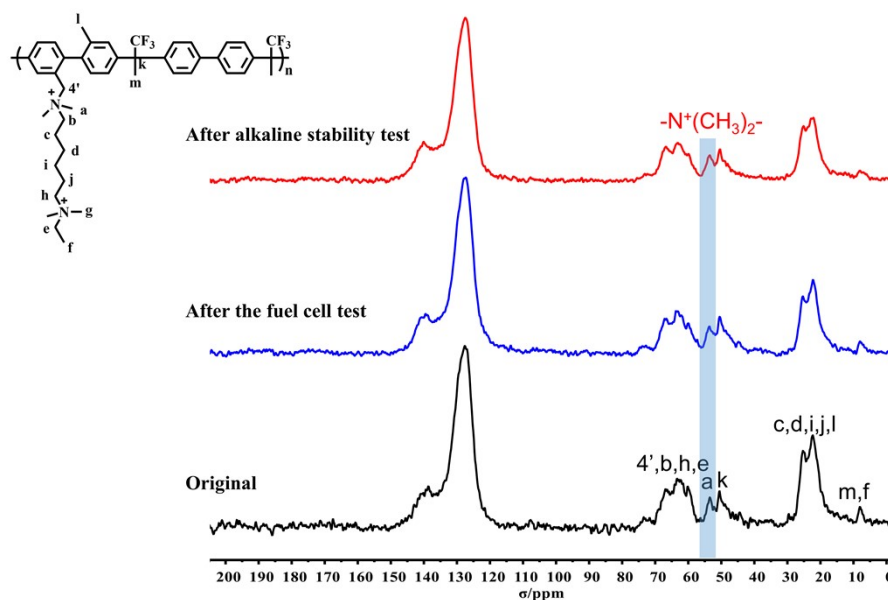

**Figure S12.** The  $^{13}\text{C}$  solid-state NMR of QABP-2 before (bottom spectrum) and after operating in fuel cell (middle spectrum) and after alkaline stability test in 1 M NaOH at  $80\text{ }^\circ\text{C}$  (top spectrum); Magic angle spinning rotation rate = 22 kHz. All spectra were normalized to the intensity of the  $d = 127\text{ ppm}$  peak to aid visual comparison.

The  $^{13}\text{C}$  solid-state NMR spectra of the degraded QABP-2 are shown in Figure S12. The resonance line at  $\sigma = 138.6\text{ ppm}$  and  $127\text{ ppm}$  correspond to the polymer-bound rings and  $-\text{CF}_3-$ , and no intensity change occurs after the fuel cell and alkaline stability test. A slight decrease in intensity of the band corresponding to the quaternary ammonium methylene carbons ( $\sigma = 53$ ). Additionally, the signal of benzylic ( $\sigma = 69$ ) and methylene ( $\sigma = 8, 22.3-25.2, 60.1-66.8$ ) in the side chains are weakened. This indicates that not only part of the QA group but also part of the benzyl group grafting was lost during the alkali treatment. Altogether, the solid-state NMR observations indicate a low level of AEM degradation, consistent with the Raman data discussed above.

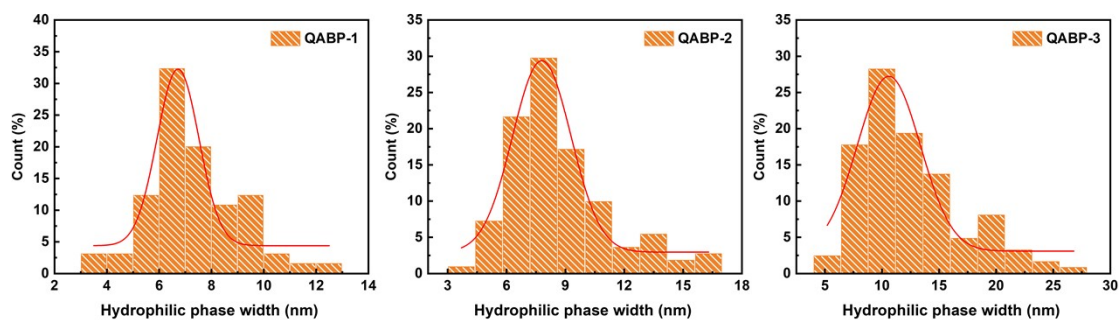

**Figure S13.** The distribution of hydrophilic phase width of QABP-x analyzed by the Nano Measurer.

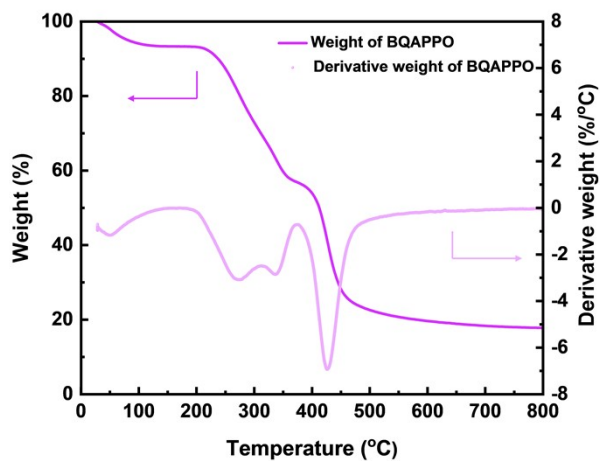

**Figure S14.** Termogravimetric analysis (TGA) and differential thermal gravity (DTG) curve of the QABPPO membrane.

**Table S2.** Summary and comparison of representative AEMFCs performance.

| Year           | AEM               | A/C Ionomer      | Anode  | Cathode | A/C Metal loading (wt%) | A/C Fuel                       | Cell temperature (°C) | A/C Back pressure (MPa) | Power density (W cm <sup>-2</sup> ) | Durability (h) | Reference |
|----------------|-------------------|------------------|--------|---------|-------------------------|--------------------------------|-----------------------|-------------------------|-------------------------------------|----------------|-----------|
| Ultrathin AEMs |                   |                  |        |         |                         |                                |                       |                         |                                     |                |           |
| 2013           | xQAPS@PTFE -25um  | TQAPS            | Pt/C   | Pt/C    | 0.4/0.4                 | H <sub>2</sub> /O <sub>2</sub> | 60                    | 0.1                     | 0.55                                | NA             | 4         |
| 2018           | QAPEEK/s-NBF-15um | QAPEEK           | PtRu/C | Pt/C    | 0.4/0.4                 | H <sub>2</sub> /O <sub>2</sub> | 60                    | 0.1                     | 0.93                                | NA             | 5         |
| 2018           | LDPE15-15um       | ETFE-based RG    | PtRu/C | Pt/C    | 0.4/0.4                 | H <sub>2</sub> /O <sub>2</sub> | 80                    | 0                       | 2.02                                | 20             | 6         |
| 2020           | GTR75-15 - 10um   | GT32 and GT73    | PtRu/C | Pt/C    | 0.672/0.584             | H <sub>2</sub> /O <sub>2</sub> | 80                    | 0                       | 3.21                                | 0              | 7         |
| 2020           | DMD-5um           | HMT-PMBI         | PtRu/C | Pt/C    | 0.3/0.3                 | H <sub>2</sub> /O <sub>2</sub> | 70                    | 0                       | 1.0                                 | 20             | 8         |
| 2021           | cQAPPT - 10um     | QAPPT            | Pt/C   | Pt/C    | 0.4/0.4                 | H <sub>2</sub> /O <sub>2</sub> | 80                    | 0.2                     | 1.85                                | NA             | 9         |
| 2021           | 2-ACPBI - 10um    | homemade ionomer | Pt/C   | Pt/C    | 0.5/0.5                 | H <sub>2</sub> /O <sub>2</sub> | 80                    | 0.1                     | 0.63                                | 10             | 10        |
| 2021           | Tec-PBI-50 - 10um | Tec-PBI-50       | Pt/C   | Pt/C    | 0.5/0.5                 | H <sub>2</sub> /O <sub>2</sub> | 80                    | 0.15                    | 1.16                                | 10             | 11        |
| 2021           | xTQA50-17um       | S29QA30          | Pt/C   | Pt/C    | NA                      | H <sub>2</sub> /O <sub>2</sub> | 60                    | 0                       | 0.405                               | NA             | 12        |
| 2022           | UHMWPE10s-10um    | PAP-BP-60        | PtRu/C | Pt/C    | 0.5/0.5                 | H <sub>2</sub> /O <sub>2</sub> | 65                    | 0.15                    | 0.709                               | 10             | 13        |



|                      |                  |                      |        |      |         |                                |    |     |       |     |           |
|----------------------|------------------|----------------------|--------|------|---------|--------------------------------|----|-----|-------|-----|-----------|
| 2022                 | PQP-100-10um     | PBP-67               | Pt/C   | Pt/C | 0.5/0.5 | H <sub>2</sub> /O <sub>2</sub> | 60 | 0   | 0.45  | NA  | 14        |
|                      | PQP-100-4um      |                      |        |      |         |                                |    |     | 0.417 |     |           |
| 2022                 | QABP-2           | QABP-3               | PtRu/C | Pt/C | 0.5/0.5 | H <sub>2</sub> /O <sub>2</sub> | 80 | 0.2 | 1.8   | 140 | This work |
| Side chain type AEMs |                  |                      |        |      |         |                                |    |     |       |     |           |
| 2019                 | CPFBP-TQA-100    | NA                   | Pt/C   | Pt/C | NA      | H <sub>2</sub> /O <sub>2</sub> | 80 | 0   | 0.116 | 24  | 15        |
| 2019                 | F20C9N           | ETFE-g-poly(VBTM AC) | PtRu/C | Pt/C | NA      | H <sub>2</sub> /O <sub>2</sub> | 60 | 0   | 1.01  | 120 | 16        |
| 2020                 | PES-NS-10%       | NA                   | Pt/C   | Pt/C | NA      | H <sub>2</sub> /O <sub>2</sub> | 60 | 0   | 0.11  | 24  | 17        |
| 2020                 | TQ-PDBA-70%      | NA                   | Pt/C   | Pt/C | NA      | H <sub>2</sub> /O <sub>2</sub> | 80 | 0   | 0.16  | 48  | 18        |
| 2020                 | QPC-TMA          | QPC-TMA              | PtRu/C | Pt/C | 0.4/0.4 | H <sub>2</sub> /O <sub>2</sub> | 60 | 0   | 1.61  | NA  | 19        |
| 2022                 | P(4PA-co-2PA)-47 | FLN-55               | Pt/C   | Pt/C | 0.5/0.5 | H <sub>2</sub> /O <sub>2</sub> | 80 | 0.1 | 0.4   | 100 | 20        |

**Table S3.** Summary and comparison of the most important properties of AEMs.

| Year | AEM           | IEC<br>(mmol g <sup>-1</sup> ) | Tensile<br>strength<br>(MPa) | Elongation<br>at break (%) | Water uptake <sup>a</sup><br>(%) | Swelling ratio <sup>a</sup><br>(%) | OH <sup>-</sup><br>Conductivity <sup>b</sup><br>(mS cm <sup>-1</sup> ) | Alkaline<br>stability time <sup>c</sup><br>(h) | Reference |
|------|---------------|--------------------------------|------------------------------|----------------------------|----------------------------------|------------------------------------|------------------------------------------------------------------------|------------------------------------------------|-----------|
| 2013 | xQAPS@PTFE    | 1.23                           | 31.1                         | NA                         | NA                               | 0                                  | 28 (60 °C)                                                             | NA                                             | 4         |
| 2017 | XE-Imd70      | 2.72                           | 60.2                         | 23.7                       | 58 (20 °C)                       | 62 (80 °C)                         | 28-103                                                                 | 510                                            | 21        |
| 2018 | QAPEEK/s-NBF  | 1.76                           | 15.2                         | NA                         | 67                               | 7.5                                | 21.4-119                                                               | 120                                            | 5         |
| 2018 | LDPE15        | 2.54                           | 23                           | 71                         | 149                              | 27                                 | 100-210                                                                | 500                                            | 6         |
| 2019 | CPFBP-TQA-100 | 1.94                           | 11.0                         | 9.6                        | 28.9                             | 22.0                               | 28.89-76.85                                                            | 500 (2 M)                                      | 15        |
| 2019 | F20C9N        | 1.12                           | NA                           | NA                         | 109 (25 °C)                      | 26 (25 °C)                         | 23-91                                                                  | 1000                                           | 16        |
| 2020 | GTR75-15      | 3.47                           | NA                           | NA                         | 73 (25 °C)                       | 16 (25 °C)                         | 68-152                                                                 | 1050                                           | 7         |
| 2020 | PES-NS-10%    | 1.7                            | 35.13                        | 3.37                       | 13.33                            | 5.77                               | 40-90                                                                  | 864 (2 M)                                      | 17        |
| 2020 | TQ-PDBA-70%   | 2.16                           | 33.42                        | 14.43                      | 10.84                            | 3.23                               | 36-137                                                                 | 1000                                           | 18        |
| 2020 | QPC-TMA       | 2.31                           | NA                           | NA                         | 28 (25 °C)                       | 9 (25 °C)                          | 77-154                                                                 | 1000                                           | 19        |
| 2021 | cQAPPT        | 1.8                            | 27                           | 22                         | 15                               | 12.5                               | 34-70                                                                  | 168                                            | 9         |

|      |                   |      |       |      |              |             |            |                  |               |
|------|-------------------|------|-------|------|--------------|-------------|------------|------------------|---------------|
| 2021 | 2-ACPBI           | 1.75 | 14    | 79   | 32.3         | 8.6         | 50-91.2    | 480 (2 M)        | <sup>10</sup> |
| 2021 | Tec-PBI-50        | 3.10 | 14    | 65   | 67.5         | 20          | 63.2-131.8 | 672 (2 M, 60 °C) | <sup>11</sup> |
| 2021 | xTQA50-PPO-SEBS   | 1.43 | 34    | 65   | 67.2 (20 °C) | 9.1 (20 °C) | 43.1-89.9  | 500              | <sup>12</sup> |
| 2022 | UHMWPE4-s-AERM10% | 1.51 | 155.4 | 53.6 | 9.3          | NA          | 31-102     | 1440             | <sup>13</sup> |
| 2022 | PQP-100           | 2.3  | 83.9  | 15.8 | 20.0         | 20.6        | 56.7-118.7 | 1344             | <sup>14</sup> |
| 2022 | P(4PA-co-2PA)-47  | 2.07 | 39.1  | 11.2 | 13.6         | 1.5         | 30-75      | 720              | <sup>20</sup> |
| 2022 | QABP-2            | 2.01 | 45.7  | 28.3 | 55.3         | 16.9        | 69-123     | 1000             | This work     |

<sup>a</sup> Measured in 30 °C;

<sup>b</sup> Measured from 30 °C to 80 °C;

<sup>c</sup> Measured in 1 M NaOH/KOH at 80 °C.

**Table S4** Summary of the gas permeability of AEMs.

| AEM               | H <sub>2</sub> permeability                               | O <sub>2</sub> permeability                                | Reference |
|-------------------|-----------------------------------------------------------|------------------------------------------------------------|-----------|
| xTQA50-PPO-SEBS   | 13.5 barrer                                               | NA                                                         | 12        |
| UHMWPE4-s-AERM10% | 0.06 (10*10 <sup>-13</sup> mol/(KPa*s*cm))                | NA                                                         | 13        |
| PQP-100           | 0.57 barrer/cm                                            | 0.023 barrer/cm                                            | 14        |
| PAP-TP-85         | 2.4*10 <sup>-13</sup> mol/(KPa*s*cm))                     | 0.6*10 <sup>-13</sup> mol/(KPa*s*cm))                      | 22        |
| BQAPPO            | 1.94 (cm <sup>3</sup> cm <sup>2</sup> min <sup>-1</sup> ) | 1.005 (cm <sup>3</sup> cm <sup>2</sup> min <sup>-1</sup> ) | This work |
| QABP-2            | 1.57 (cm <sup>3</sup> cm <sup>2</sup> min <sup>-1</sup> ) | m <sup>3</sup> cm <sup>2</sup> min <sup>-1</sup> )         |           |

### References

1. H.-S. Dang and P. Jannasch, *Journal of Materials Chemistry A*, 2016, **4**, 17138-17153.
2. A. M. Ahmed Mahmoud and K. Miyatake, *Journal of Materials Chemistry A*, 2018, **6**, 14400-14409.
3. S. A. Nuñez, C. Capparelli and M. A. Hickner, *Chemistry of Materials*, 2016, **28**, 2589-2598.
4. G. Li, J. Pan, J. Han, C. Chen, J. Lu and L. Zhuang, *Journal of Materials Chemistry A*, 2013, **1**.
5. Y. Peng, Y. Wang, X. Wei, J. Zhou, H. Peng, L. Xiao, J. Lu and L. Zhuang, *ACS Appl Mater Interfaces*, 2018, **10**, 33581-33588.
6. L. Wang, M. Bellini, H. A. Miller and J. R. Varcoe, *Journal of Materials Chemistry A*, 2018, **6**, 15404-15412.
7. M. Mandal, G. Huang, N. U. Hassan, W. E. Mustain and P. A. Kohl, *Journal of Materials Chemistry A*, 2020, **8**, 17568-17578.
8. P. Veh, B. Britton, S. Holdcroft, R. Zengerle, S. Vierrath and M. Breitwieser, *RSC Adv*, 2020, **10**, 8645-8652.
9. S. Chen, H. Peng, M. Hu, G. Wang, L. Xiao, J. Lu and L. Zhuang, *ACS Applied Energy Materials*, 2021, **4**, 4297-4301.
10. X. Wang, J. Li, W. Chen, B. Pang, Y. Liu, Y. Guo, X. Wu, F. Cui and G. He, *ACS Appl Mater Interfaces*, 2021, **13**, 49840-49849.
11. X. Wang, W. Chen, T. Li, X. Yan, Y. Zhang, F. Zhang, X. Wu, B. Pang, J. Li and G. He, *Journal of Materials Chemistry A*, 2021, **9**, 7522-7530.
12. S. Sung, J. E. Chae, K. Min, H.-J. Kim, S. Y. Nam and T.-H. Kim, *Journal of Materials Chemistry A*, 2021, **9**, 1062-1079.
13. W. Yuan, L. Zeng, Y. Li, J. Wang, X. Wang, Q. Liao, L. Li and Z. Wei, *Small*, 2022, **18**, e2105499.
14. M. Liu, X. Hu, B. Hu, L. Liu and N. Li, *Journal of Membrane Science*, 2022, **642**.
15. H. Y. Wu, Q. Yang, X. L. Gao, Z. Y. Zhu, Q. H. Sun, Q. G. Zhang, A. M. Zhu and Q. L. Liu, *Electrochimica Acta*, 2019, **321**.

16. L. Zhu, X. Peng, S. L. Shang, M. T. Kwasny, T. J. Zimudzi, X. Yu, N. Saikia, J. Pan, Z. K. Liu, G. N. Tew, W. E. Mustain, M. Yandrasits and M. A. Hickner, *Advanced Functional Materials*, 2019, **29**.
17. F. H. Liu, Q. Yang, X. L. Gao, H. Y. Wu, Q. G. Zhang, A. M. Zhu and Q. L. Liu, *Journal of Membrane Science*, 2020, **595**.
18. X. L. Gao, L. X. Sun, H. Y. Wu, Z. Y. Zhu, N. Xiao, J. H. Chen, Q. Yang, Q. G. Zhang, A. M. Zhu and Q. L. Liu, *Journal of Materials Chemistry A*, 2020, **8**, 13065-13076.
19. M. S. Cha, J. E. Park, S. Kim, S.-H. Han, S.-H. Shin, S. H. Yang, T.-H. Kim, D. M. Yu, S. So, Y. T. Hong, S. J. Yoon, S.-G. Oh, S. Y. Kang, O.-H. Kim, H. S. Park, B. Bae, Y.-E. Sung, Y.-H. Cho and J. Y. Lee, *Energy & Environmental Science*, 2020, **13**, 3633-3645.
20. T. Jiang, C. Wu, Y. Zhou, S. Cheng, S. Yang, H. Wei, Y. Ding and Y. Wu, *Journal of Membrane Science*, 2022, **647**.
21. K. H. Lee, D. H. Cho, Y. M. Kim, S. J. Moon, J. G. Seong, D. W. Shin, J.-Y. Sohn, J. F. Kim and Y. M. Lee, *Energy & Environmental Science*, 2017, **10**, 275-285.
22. J. Wang, Y. Zhao, B. P. Setzler, S. Rojas-Carbonell, C. Ben Yehuda, A. Amel, M. Page, L. Wang, K. Hu, L. Shi, S. Gottesfeld, B. Xu and Y. Yan, *Nature Energy*, 2019, **4**, 392-398.
